# Supplementary material for: Bidirectional synaptic plasticity rapidly modifies hippocampal representations
Source: eLife journal article supplement (doi:10.7554/elife.73046), 2021-12-09
Supplement: supp [file elife-73046-supp-v2.zip]

Archive with 11 entries (11 files):
- elife_poa_e73046_Transparent_Reporting_File.pdf
- elife_poa_e73046_Figure_1_figure_supplement_1.ai
- elife_poa_e73046_Figure_1_figure_supplement_2.ai
- elife_poa_e73046_Figure_2_figure_supplement_1.ai
- elife_poa_e73046_Figure_3_figure_supplement_1.ai
- elife_poa_e73046_Figure_4_figure_supplement_1.ai
- elife_poa_e73046_Figure_4_figure_supplement_2.ai
- elife_poa_e73046_Figure_6_figure_supplement_1.ai
- elife_poa_e73046_Figure_6_figure_supplement_2.ai
- elife_poa_e73046_Figure_6_figure_supplement_3.ai
- elife_poa_e73046_Figure_7_figure_supplement_1.ai
